# Supplementary material for: The conformational landscape of tartrate-based inhibitors of the TACE enzyme as revealed by Hamiltonian Replica Exchange simulation
Source: Royal Society of Chemistry journal article supplement (doi:10.1039/c3cp00108c), 2013-01-01
Supplement: c3cp00108c.pdf [file c3cp00108c.pdf]

# **Supporting information for: Characterization and optimization of tartrate-based TACE inhibitors through Hamiltonian Replica Exchange**

Carlo Guardiani and Piero Procacci\*

*Department of Chemistry, University of Florence, Italy*

E-mail: [piero.procacci@unifi.it](mailto:piero.procacci@unifi.it)

---

\*To whom correspondence should be addressed

## Force field parameters

Figure 1: Atom names of Drug-1 and Drug-6.

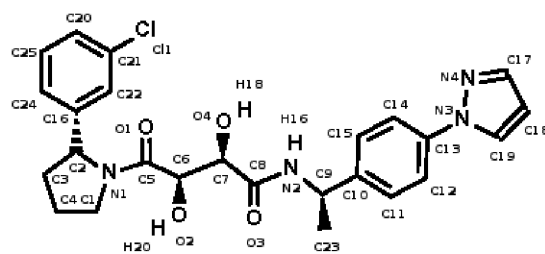

**Drug-1**

**Drug-6RS**

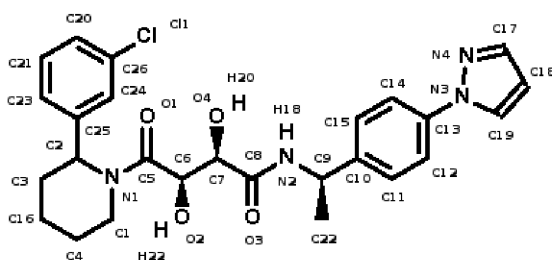

Figure 2: Atom names of Drug-38 and Drug-39.

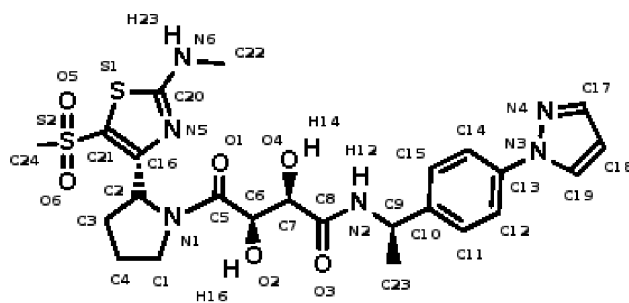

**Drug-38**

**Drug-39RS**

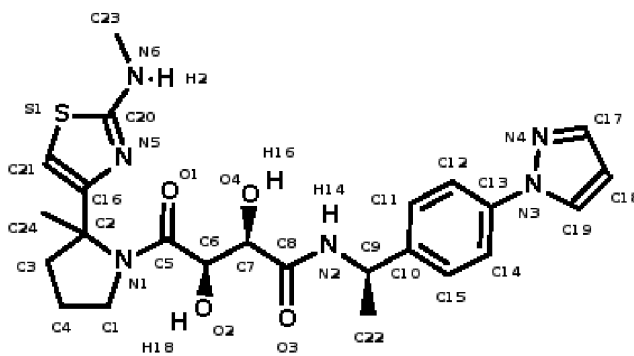

Figure 3: Atom names of Drug-43 and Drug-44.

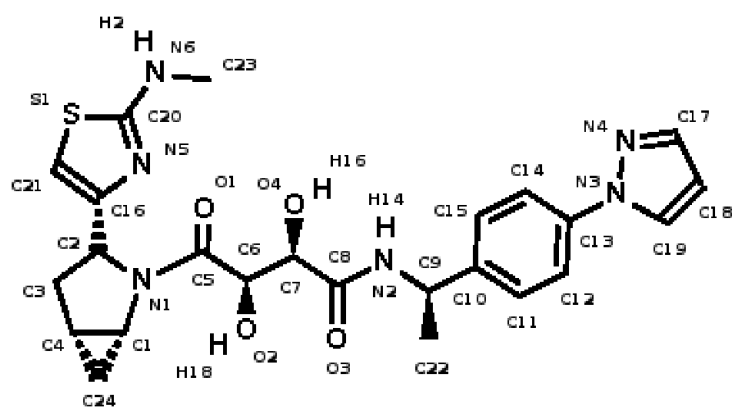

**Drug-43**

**Drug-44**

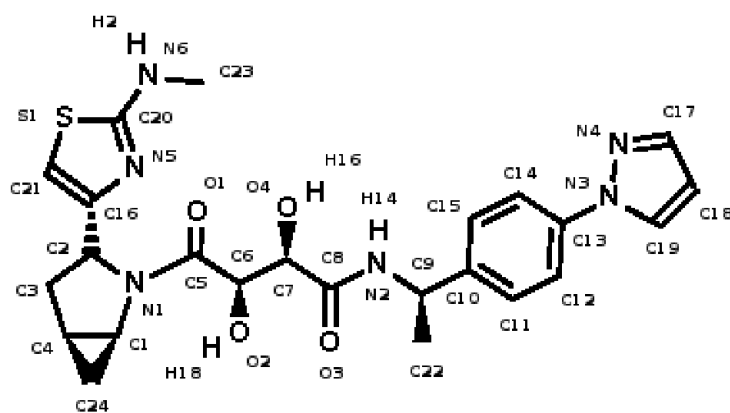

Figure 4: Atom names of drug IK682.

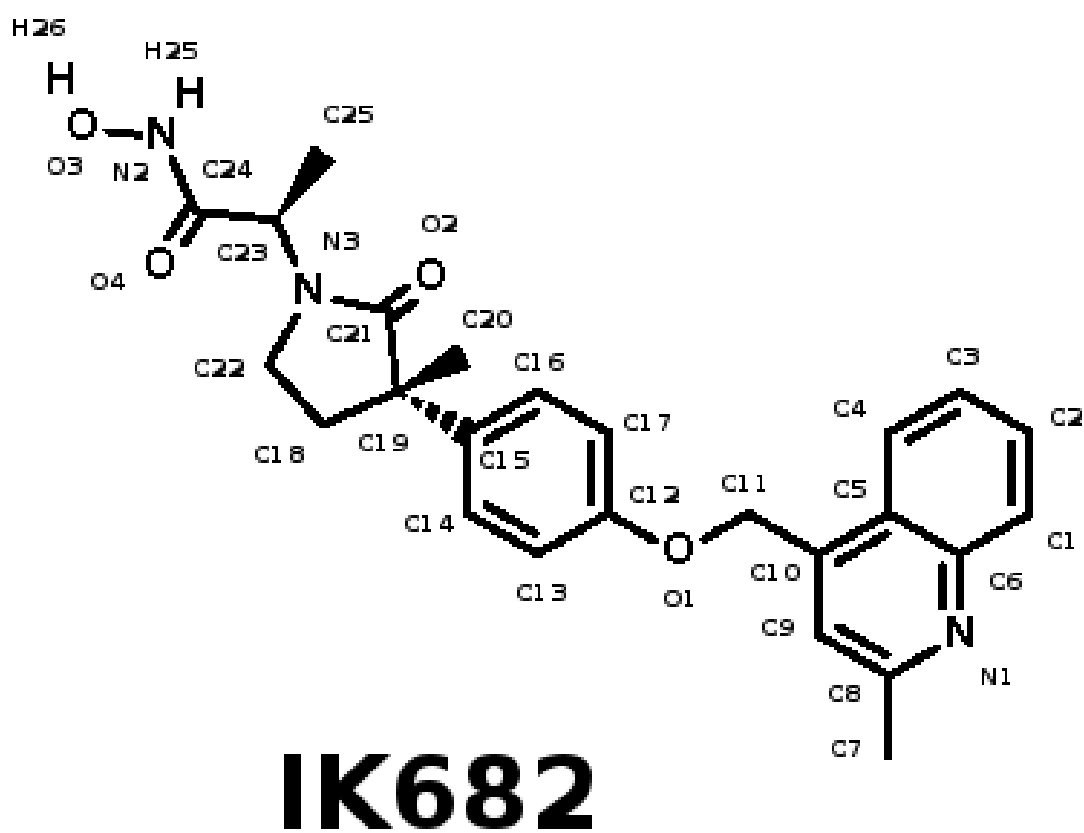

Figure 5: Atom names of compound Quino-1.

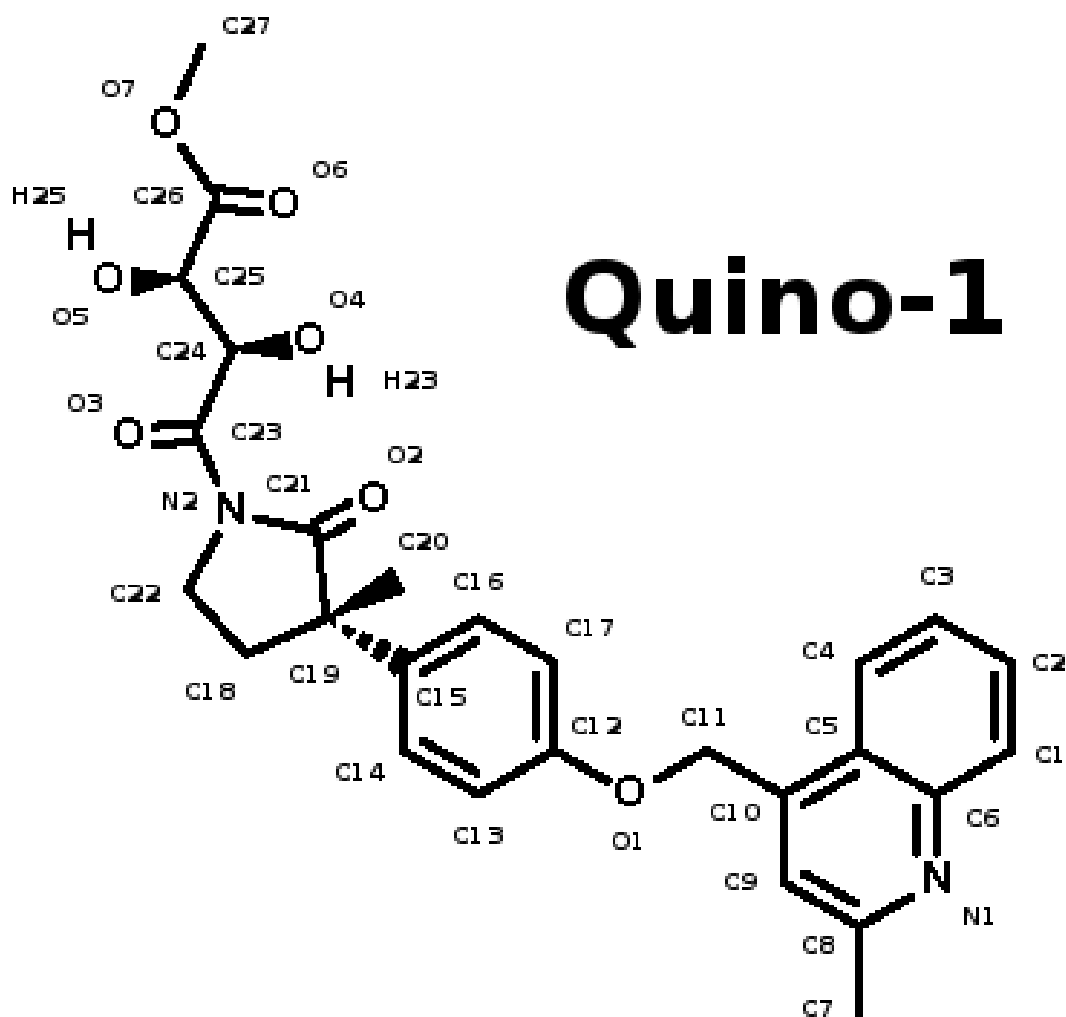

Figure 6: Atom names of compound Quino-2.

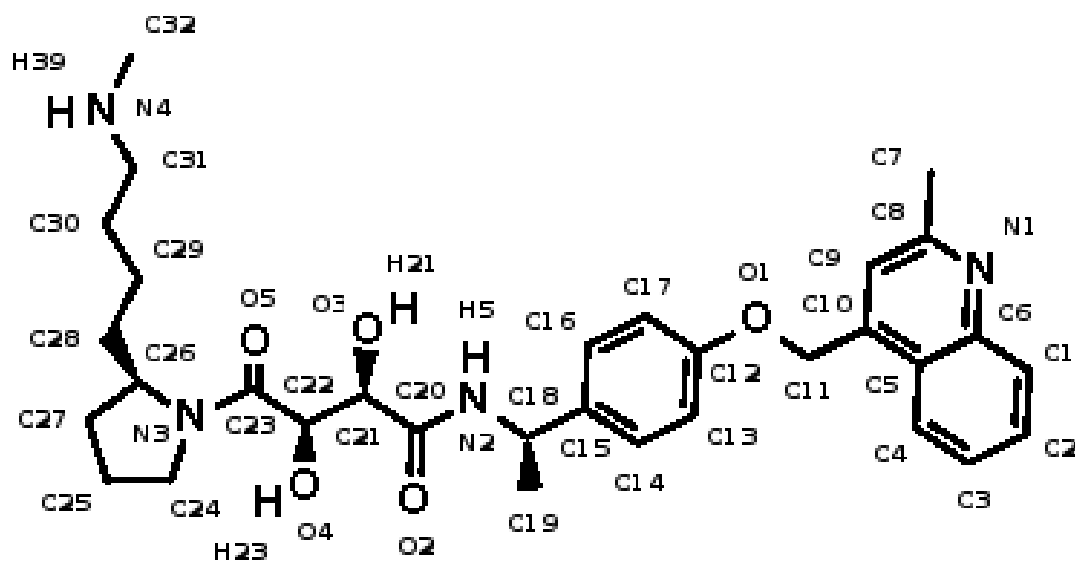

# Quino-2

**Table 1: Atomic charges (in electrons) of drug-1. The atom types are those defined in the GAFF force field.**

| Atom | Atom Type | Charge    | Atom | Atom Type | Charge    |
|------|-----------|-----------|------|-----------|-----------|
| C1   | c3        | -0.016391 | H21  | h1        | 0.039305  |
| H22  | h1        | 0.039305  | N1   | n         | -0.101946 |
| C2   | c3        | -0.004756 | H27  | h1        | 0.112603  |
| C3   | c3        | -0.180921 | H25  | hc        | 0.078957  |
| H26  | hc        | 0.078957  | C4   | c3        | 0.030610  |
| H23  | hc        | 0.020823  | H24  | hc        | 0.020823  |
| C16  | ca        | 0.061114  | C24  | ca        | -0.090690 |
| H3   | ha        | 0.124085  | C22  | ca        | -0.085961 |
| H2   | ha        | 0.122635  | C21  | ca        | -0.036061 |
| C11  | cl        | -0.117335 | C20  | ca        | -0.022692 |
| H1   | ha        | 0.126094  | C25  | ca        | -0.251779 |
| H4   | ha        | 0.169458  | C5   | c         | 0.349103  |
| O1   | o         | -0.575329 | C6   | c3        | 0.428060  |
| H19  | h1        | 0.001602  | O2   | oh        | -0.753523 |
| H20  | ho        | 0.464712  | C7   | c3        | 0.115620  |
| H17  | h1        | 0.072189  | O4   | oh        | -0.695253 |
| H18  | ho        | 0.442875  | C8   | c         | 0.758463  |
| O3   | o         | -0.656864 | N2   | n         | -0.703050 |
| H16  | hn        | 0.375329  | C9   | c3        | 0.262970  |
| H12  | h1        | 0.109846  | C23  | c3        | -0.504296 |
| H13  | hc        | 0.140118  | H14  | hc        | 0.140118  |
| H15  | hc        | 0.140118  | C10  | ca        | 0.036603  |
| C15  | ca        | -0.160739 | H9   | ha        | 0.144273  |
| C14  | ca        | -0.163711 | H8   | ha        | 0.142409  |
| C13  | ca        | 0.013042  | C11  | ca        | -0.160739 |
| H11  | ha        | 0.144273  | C12  | ca        | -0.163711 |
| H10  | ha        | 0.142409  | N3   | na        | 0.369273  |
| N4   | nc        | -0.441974 | C17  | cd        | 0.060299  |
| H5   | h4        | 0.144535  | C18  | cd        | -0.291370 |
| H6   | ha        | 0.184432  | C19  | cc        | -0.211842 |
| H7   | h4        | 0.183490  |      |           |           |



**Table 2: Atomic charges (in electrons) of drug-6R and drug-6S. The atom types are those defined in the GAFF force field.**

| Atom | Atom Type | Charge    | Atom | Atom Type | Charge    |
|------|-----------|-----------|------|-----------|-----------|
| C1   | c3        | 0.057326  | H23  | h1        | 0.027712  |
| H24  | h1        | 0.027712  | N1   | n         | -0.407385 |
| C2   | c3        | 0.038103  | H1   | h1        | 0.091805  |
| C4   | c3        | 0.064446  | H25  | hc        | -0.013245 |
| H26  | hc        | -0.013245 | C16  | c3        | 0.050044  |
| H2   | hc        | -0.010988 | H3   | hc        | -0.010988 |
| C3   | c3        | 0.013211  | H27  | hc        | 0.015163  |
| H28  | hc        | 0.015163  | C25  | ca        | -0.011665 |
| C23  | ca        | -0.087167 | H6   | ha        | 0.123857  |
| C24  | ca        | -0.075117 | H29  | ha        | 0.119147  |
| C26  | ca        | -0.011451 | C11  | cl        | -0.126292 |
| C20  | ca        | -0.047358 | H4   | ha        | 0.128121  |
| C21  | ca        | -0.215072 | H5   | ha        | 0.160413  |
| C5   | c         | 0.682415  | O1   | o         | -0.557210 |
| C6   | c3        | 0.069623  | H21  | h1        | 0.102840  |
| O2   | oh        | -0.676640 | H22  | ho        | 0.423306  |
| C7   | c3        | 0.286334  | H19  | h1        | 0.021764  |
| O4   | oh        | -0.707693 | H20  | ho        | 0.442177  |
| C8   | c         | 0.714550  | O3   | o         | -0.638314 |
| N2   | n         | -0.688472 | H18  | hn        | 0.366957  |
| C9   | c3        | 0.279440  | H14  | h1        | 0.098657  |
| C22  | c3        | -0.484882 | H15  | hc        | 0.134906  |
| H16  | hc        | 0.134906  | H17  | hc        | 0.134906  |
| C10  | ca        | 0.005300  | C15  | ca        | -0.142302 |
| H11  | ha        | 0.139233  | C14  | ca        | -0.168891 |
| H10  | ha        | 0.142889  | C13  | ca        | 0.015935  |
| C11  | ca        | -0.142302 | H13  | ha        | 0.139233  |
| C12  | ca        | -0.168891 | H12  | ha        | 0.142889  |
| N3   | na        | 0.367685  | N4   | nc        | -0.445845 |
| C17  | cd        | 0.067164  | H7   | h4        | 0.142339  |
| C18  | cd        | -0.298232 | H8   | ha        | 0.185327  |
| C19  | cc        | -0.206618 | H9   | h4        | 0.183268  |

**Table 3: Atomic charges (in electrons) of drug-39R and drug-39S. The atom types are those defined in the GAFF force field.**

| Atom | Atom Type | Charge    | Atom | Atom Type | Charge    |
|------|-----------|-----------|------|-----------|-----------|
| C1   | c3        | 0.168341  | H19  | h1        | -0.017899 |
| H20  | h1        | -0.017899 | N1   | n         | -0.343065 |
| C2   | c3        | 0.273256  | C4   | c3        | 0.150273  |
| H21  | hc        | -0.023352 | H22  | hc        | -0.023352 |
| C3   | c3        | -0.213181 | H23  | hc        | 0.074167  |
| H24  | hc        | 0.074167  | C24  | c3        | -0.479009 |
| H25  | hc        | 0.132340  | H26  | hc        | 0.132340  |
| H27  | hc        | 0.132340  | C16  | cc        | 0.200442  |
| N5   | nc        | -0.526042 | C21  | cd        | -0.388867 |
| H1   | h4        | 0.272956  | C20  | cd        | 0.562358  |
| S1   | ss        | -0.065141 | N6   | nh        | -0.649244 |
| H2   | hn        | 0.384654  | C23  | c3        | -0.016450 |
| H28  | h1        | 0.075516  | H29  | h1        | 0.075516  |
| H30  | h1        | 0.075516  | C5   | c         | 0.595253  |
| O1   | o         | -0.616878 | C6   | c3        | 0.154127  |
| H17  | h1        | 0.099347  | O2   | oh        | -0.664282 |
| H18  | ho        | 0.423955  | C7   | c3        | 0.162199  |
| H15  | h1        | 0.015738  | O4   | oh        | -0.749490 |
| H16  | ho        | 0.481526  | C8   | c         | 0.820984  |
| O3   | o         | -0.671999 | N2   | n         | -0.736931 |
| H14  | hn        | 0.404029  | C9   | c3        | 0.295269  |
| H10  | h1        | 0.097400  | C22  | c3        | -0.470725 |
| H11  | hc        | 0.128475  | H12  | hc        | 0.128475  |
| H13  | hc        | 0.128475  | C10  | ca        | 0.032115  |
| C11  | ca        | -0.153155 | H8   | ha        | 0.138723  |
| C12  | ca        | -0.163068 | H6   | ha        | 0.141582  |
| C13  | ca        | -0.005661 | C15  | ca        | -0.153155 |
| H9   | ha        | 0.138723  | C14  | ca        | -0.163068 |
| H7   | ha        | 0.141582  | N3   | na        | 0.386414  |
| N4   | nc        | -0.448841 | C17  | cd        | 0.066452  |
| H3   | h4        | 0.142008  | C18  | cd        | -0.302868 |
| H4   | ha        | 0.185580  | C19  | cc        | -0.210394 |
| H5   | h4        | 0.181404  |      |           |           |

**Table 4: Atomic charges (in electrons) of drug-38. The atom types are those defined in the GAFF force field.**

| Atom | Atom Type | Charge    | Atom | Atom Type | Charge    |
|------|-----------|-----------|------|-----------|-----------|
| C1   | c3        | -0.027882 | H17  | h1        | 0.044968  |
| H18  | h1        | 0.044968  | N1   | n         | -0.215902 |
| C2   | c3        | 0.117580  | H30  | h1        | 0.110952  |
| C4   | c3        | 0.166984  | H19  | hc        | -0.011807 |
| H20  | hc        | -0.011807 | C3   | c3        | -0.367520 |
| H21  | hc        | 0.121334  | H22  | hc        | 0.121334  |
| C16  | cc        | 0.122191  | C21  | cd        | -0.185498 |
| N5   | nc        | -0.217403 | C20  | cd        | 0.345479  |
| S1   | ss        | -0.082553 | S2   | sy        | 1.038850  |
| O5   | o         | -0.545877 | O6   | o         | -0.545877 |
| C24  | c3        | -0.460459 | H27  | h1        | 0.162262  |
| H28  | h1        | 0.162262  | H29  | h1        | 0.162262  |
| N6   | nh        | -0.600650 | H23  | hn        | 0.425257  |
| C22  | c3        | -0.041322 | H24  | h1        | 0.084164  |
| H25  | h1        | 0.084164  | H26  | h1        | 0.084164  |
| C5   | c         | 0.481712  | O1   | o         | -0.577868 |
| C6   | c3        | 0.298368  | H15  | h1        | 0.033877  |
| O2   | oh        | -0.726452 | H16  | ho        | 0.453364  |
| C7   | c3        | 0.097746  | H13  | h1        | 0.020068  |
| O4   | oh        | -0.693029 | H14  | ho        | 0.449160  |
| C8   | c         | 0.846953  | O3   | o         | -0.675535 |
| N2   | n         | -0.720504 | H12  | hn        | 0.365378  |
| C9   | c3        | 0.387850  | H8   | h1        | 0.074247  |
| C23  | c3        | -0.541873 | H9   | hc        | 0.141942  |
| H10  | hc        | 0.141942  | H11  | hc        | 0.141942  |
| C10  | ca        | -0.057301 | C11  | ca        | -0.134721 |
| H6   | ha        | 0.145441  | C12  | ca        | -0.176728 |
| H4   | ha        | 0.143058  | C13  | ca        | 0.021793  |
| C15  | ca        | -0.134721 | H7   | ha        | 0.145441  |
| C14  | ca        | -0.176728 | H5   | ha        | 0.143058  |
| N3   | na        | 0.372345  | N4   | nc        | -0.447081 |
| C17  | cd        | 0.064671  | H1   | h4        | 0.142999  |
| C18  | cd        | -0.295091 | H2   | ha        | 0.185396  |
| C19  | cc        | -0.208913 | H3   | h4        | 0.183178  |

**Table 5: Atomic charges (in electrons) of drug-43 and drug-44. The atom types are those defined in the GAFF force field.**

| Atom | Atom Type | Charge    | Atom | Atom Type | Charge    |
|------|-----------|-----------|------|-----------|-----------|
| C1   | cx        | -0.088766 | H20  | h1        | 0.094740  |
| N1   | n         | -0.022194 | C2   | c3        | 0.208728  |
| H23  | h1        | 0.057032  | C4   | cx        | 0.069424  |
| H19  | hc        | 0.105149  | C24  | cx        | -0.370242 |
| H24  | hc        | 0.144044  | H25  | hc        | 0.144044  |
| C3   | c3        | -0.499109 | H21  | hc        | 0.182338  |
| H22  | hc        | 0.182338  | C16  | cc        | 0.135717  |
| C21  | cd        | -0.321216 | H1   | h4        | 0.244874  |
| N5   | nc        | -0.716617 | C20  | cd        | 0.743772  |
| S1   | ss        | -0.093009 | N6   | nh        | -0.715209 |
| H2   | hn        | 0.401324  | C23  | c3        | 0.104165  |
| H26  | h1        | 0.039255  | H27  | h1        | 0.039255  |
| H28  | h1        | 0.039255  | C5   | c         | 0.457258  |
| O1   | o         | -0.634520 | C6   | c3        | 0.319399  |
| H17  | h1        | 0.021896  | O2   | oh        | -0.745170 |
| H18  | ho        | 0.467553  | C7   | c3        | 0.219612  |
| H15  | h1        | 0.057778  | O4   | oh        | -0.703286 |
| H16  | ho        | 0.431766  | C8   | c         | 0.680520  |
| O3   | o         | -0.636782 | N2   | n         | -0.639810 |
| H14  | hn        | 0.349200  | C9   | c3        | 0.355198  |
| H10  | h1        | 0.086733  | C22  | c3        | -0.551923 |
| H11  | hc        | 0.143277  | H12  | hc        | 0.143277  |
| H13  | hc        | 0.143277  | C10  | ca        | -0.034079 |
| C11  | ca        | -0.150295 | H8   | ha        | 0.148741  |
| C12  | ca        | -0.167035 | H6   | ha        | 0.140423  |
| C13  | ca        | 0.026894  | C15  | ca        | -0.150295 |
| H9   | ha        | 0.148741  | C14  | ca        | -0.167035 |
| H7   | ha        | 0.140423  | N3   | na        | 0.357747  |
| N4   | nc        | -0.441270 | C17  | cd        | 0.063897  |
| H3   | h4        | 0.141877  | C18  | cd        | -0.295692 |
| H4   | ha        | 0.183443  | C19  | cc        | -0.200513 |
| H5   | h4        | 0.179685  |      |           |           |

**Table 6: Atomic charges (in electrons) of drug IK682. The atom types are those defined in the GAFF force field.**

| Atom | Atom Type | Charge    | Atom | Atom Type | Charge    |
|------|-----------|-----------|------|-----------|-----------|
| C1   | ca        | -0.311301 | H2   | ha        | 0.175766  |
| C2   | ca        | -0.105982 | H1   | ha        | 0.146204  |
| C3   | ca        | -0.183221 | H3   | ha        | 0.151851  |
| C4   | ca        | -0.137189 | H4   | ha        | 0.126672  |
| C5   | ca        | -0.245370 | C6   | ca        | 0.605589  |
| N1   | nb        | -0.766828 | C8   | ca        | 0.712199  |
| C7   | c3        | -0.361161 | H6   | hc        | 0.097469  |
| H7   | hc        | 0.097469  | H8   | hc        | 0.097469  |
| C9   | ca        | -0.597878 | H5   | ha        | 0.232392  |
| C10  | ca        | 0.226387  | C11  | c3        | 0.164829  |
| H9   | h1        | 0.059418  | H10  | h1        | 0.059418  |
| O1   | os        | -0.417676 | C12  | ca        | 0.403024  |
| C13  | ca        | -0.286413 | H11  | ha        | 0.166000  |
| C14  | ca        | -0.186616 | H14  | ha        | 0.170302  |
| C17  | ca        | -0.286413 | H12  | ha        | 0.166000  |
| C16  | ca        | -0.186616 | H13  | ha        | 0.170302  |
| C15  | ca        | 0.055450  | C19  | c3        | 0.082342  |
| C20  | c3        | -0.338037 | H15  | hc        | 0.101381  |
| H16  | hc        | 0.101381  | H17  | hc        | 0.101381  |
| C18  | c3        | -0.351562 | H18  | hc        | 0.115247  |
| H19  | hc        | 0.115247  | C22  | c3        | 0.124867  |
| H20  | h1        | 0.039258  | H21  | h1        | 0.039258  |
| C21  | c         | 0.687966  | O2   | o         | -0.651734 |
| N3   | n         | -0.315899 | C23  | c3        | 0.059967  |
| H27  | h1        | 0.051642  | C25  | c3        | -0.276691 |
| H22  | hc        | 0.093813  | H23  | hc        | 0.093813  |
| H24  | hc        | 0.093813  | C24  | c         | 0.688372  |
| O4   | o         | -0.571167 | N2   | n         | -0.516413 |
| H25  | hn        | 0.430150  | O3   | oh        | -0.431492 |
| H26  | ho        | 0.421553  |      |           |           |

**Table 7: Atomic charges (in electrons) of drug Quino-1. The atom types are those defined in the GAFF force field.**

| Atom | Atom Type | Charge    | Atom | Atom Type | Charge    |
|------|-----------|-----------|------|-----------|-----------|
| C1   | ca        | -0.322184 | H3   | ha        | 0.177899  |
| C2   | ca        | -0.100184 | H2   | ha        | 0.146292  |
| C3   | ca        | -0.184692 | H4   | ha        | 0.152309  |
| C4   | ca        | -0.136139 | H5   | ha        | 0.127595  |
| C5   | ca        | -0.250593 | C10  | ca        | 0.210016  |
| C6   | ca        | 0.623975  | N1   | nb        | -0.769463 |
| C8   | ca        | 0.710916  | C9   | ca        | -0.592983 |
| H6   | ha        | 0.230431  | C7   | c3        | -0.363211 |
| H7   | hc        | 0.098760  | H8   | hc        | 0.098760  |
| H9   | hc        | 0.098760  | C11  | c3        | 0.178497  |
| H10  | h1        | 0.057339  | H11  | h1        | 0.057339  |
| O1   | os        | -0.419581 | C12  | ca        | 0.373417  |
| C13  | ca        | -0.254972 | H12  | ha        | 0.166195  |
| C14  | ca        | -0.186136 | H15  | ha        | 0.168183  |
| C16  | ca        | -0.186136 | H14  | ha        | 0.168183  |
| C17  | ca        | -0.254972 | H13  | ha        | 0.166195  |
| C15  | ca        | -0.010699 | C19  | c3        | 0.285205  |
| C18  | c3        | -0.589363 | H19  | hc        | 0.171312  |
| H20  | hc        | 0.171312  | C22  | c3        | 0.317754  |
| H21  | h1        | 0.009704  | H22  | h1        | 0.009704  |
| N2   | n         | -0.246856 | C21  | c         | 0.429269  |
| O2   | o         | -0.540907 | C20  | c3        | -0.371144 |
| H16  | hc        | 0.110436  | H17  | hc        | 0.110436  |
| H18  | hc        | 0.110436  | C23  | c         | 0.386395  |
| O3   | o         | -0.513128 | C24  | c3        | 0.613878  |
| H1   | h1        | -0.038204 | O4   | oh        | -0.712337 |
| H23  | ho        | 0.444253  | C25  | c3        | -0.051655 |
| H24  | h1        | 0.097781  | O5   | oh        | -0.673997 |
| H25  | ho        | 0.466213  | C26  | c         | 0.770583  |
| O6   | o         | -0.601426 | O7   | os        | -0.363100 |
| C27  | c3        | -0.122669 | H26  | h1        | 0.113666  |
| H27  | h1        | 0.113666  | H28  | h1        | 0.113666  |

**Table 8: Charges (in electrons) and atom-types (GAFF) of Quino-2.**

| Atom | Atom Type | Charge    | Atom | Atom Type | Charge    |
|------|-----------|-----------|------|-----------|-----------|
| C1   | ca        | -0.314772 | H7   | ha        | 0.175992  |
| C2   | ca        | -0.104361 | H6   | ha        | 0.145571  |
| C3   | ca        | -0.184889 | H8   | ha        | 0.152158  |
| C4   | ca        | -0.146168 | H9   | ha        | 0.131817  |
| C5   | ca        | -0.222824 | C10  | ca        | 0.190336  |
| C6   | ca        | 0.602963  | N1   | nb        | -0.768231 |
| C7   | c3        | -0.383653 | H11  | hc        | 0.102380  |
| H12  | hc        | 0.102380  | H13  | hc        | 0.102380  |
| C8   | ca        | 0.719016  | C9   | ca        | -0.590764 |
| H10  | ha        | 0.225857  | C11  | c3        | 0.191762  |
| H14  | h1        | 0.052001  | H15  | h1        | 0.052001  |
| O1   | os        | -0.416377 | C12  | ca        | 0.394654  |
| C13  | ca        | -0.289377 | H16  | ha        | 0.172593  |
| C14  | ca        | -0.142651 | H19  | ha        | 0.148920  |
| C16  | ca        | -0.142651 | H18  | ha        | 0.148920  |
| C17  | ca        | -0.289377 | H17  | ha        | 0.172593  |
| C15  | ca        | -0.075697 | C18  | c3        | 0.404618  |
| H1   | h1        | 0.067537  | N2   | n         | -0.640652 |
| H5   | hn        | 0.351637  | C19  | c3        | -0.526133 |
| H2   | hc        | 0.133107  | H3   | hc        | 0.133107  |
| H4   | hc        | 0.133107  | C20  | c         | 0.621408  |
| O2   | o         | -0.605359 | C21  | c3        | 0.132165  |
| H20  | h1        | 0.046983  | O3   | oh        | -0.723701 |
| H21  | ho        | 0.457775  | C22  | c3        | 0.328704  |
| H22  | h1        | 0.038719  | O4   | oh        | -0.712364 |
| H23  | ho        | 0.459323  | C23  | c         | 0.417745  |
| O5   | o         | -0.541944 | N3   | n         | -0.172094 |
| C26  | c3        | 0.098367  | H30  | h1        | 0.072372  |
| C24  | c3        | -0.013866 | H24  | h1        | 0.059800  |
| H27  | h1        | 0.059800  | C25  | c3        | -0.017342 |
| H25  | hc        | 0.032782  | H26  | hc        | 0.032782  |
| C27  | c3        | -0.212063 | H28  | hc        | 0.069468  |
| H29  | hc        | 0.069468  | C28  | c3        | 0.032963  |
| H31  | hc        | 0.003168  | H32  | hc        | 0.003168  |
| C29  | c3        | 0.046692  | H33  | hc        | -0.028723 |
| H34  | hc        | -0.028723 | C30  | c3        | 0.013885  |
| H35  | hc        | -0.005418 | H36  | hc        | -0.005418 |
| C31  | c3        | 0.198716  | H37  | h1        | 0.012710  |
| H38  | h1        | 0.012710  | N4   | n3        | -0.761889 |
| H39  | hn        | 0.365046  | C32  | c3        | 0.072670  |
| H40  | h1        | 0.033562  | H41  | h1        | 0.033562  |
| H42  | h1        | 0.033562  |      |           |           |

## Clustering Analysis

Clustering analysis have been done using the Quality Threshold algorithm described in the section “Methods” of the main paper. In the following we report the results of such analysis obtained from the configurations sampled in the target replica from a 8 ns H-REM simulation at P=1 atm and T=300 K for all drugs reported in Figure 1-Figure 6.

**Table 9: Clustering analysis of drug-1 in pure water (distance cutoff: 2.0 Å). The Table lists the 10 most populated clusters accounting together for 76% of the equilibrium ensemble. For each cluster the relative population and a short description of the typical structural motif are reported (COMP: compact structure; EXT: extended conformation). The population of each cluster is normalized with respect to the total equilibrium ensemble (16016 structures).**

| Clust | Rel. Pop. | Short Desc |
|-------|-----------|------------|
| 1     | 0.24      | COMP       |
| 2     | 0.14      | COMP       |
| 3     | 0.07      | EXT        |
| 4     | 0.07      | COMP       |
| 5     | 0.07      | COMP       |
| 6     | 0.05      | COMP       |
| 7     | 0.05      | COMP       |
| 8     | 0.03      | COMP       |
| 9     | 0.02      | COMP       |
| 10    | 0.02      | EXT        |



**Table 10: Clustering analysis of drug-6R in pure water (distance cutoff: 2.0 Å). The Table lists the 10 most populated clusters accounting together for 42% of the equilibrium ensemble. For each cluster the relative population and a short description of the typical structural motif are reported (COMP: compact structure; EXT: extended conformation). The population of each cluster is normalized with respect to the total equilibrium ensemble (16016 structures).**

| Clust | Rel. Pop. | Short Desc |
|-------|-----------|------------|
| 1     | 0.09      | EXT        |
| 2     | 0.05      | COMP       |
| 3     | 0.05      | EXT        |
| 4     | 0.05      | COMP       |
| 5     | 0.05      | COMP       |
| 6     | 0.03      | COMP       |
| 7     | 0.03      | COMP       |
| 8     | 0.03      | COMP       |
| 9     | 0.02      | COMP       |
| 10    | 0.02      | EXT        |

**Table 11: Clustering analysis of drug-6S in pure water (distance cutoff: 2.0 Å). The Table lists the 10 most populated clusters accounting together for 40% of the equilibrium ensemble. For each cluster the relative population and a short description of the typical structural motif are reported (COMP: compact structure; EXT: extended conformation). The population of each cluster is normalized with respect to the total equilibrium ensemble (16016 structures).**

| Clust | Rel. Pop. | Short Desc |
|-------|-----------|------------|
| 1     | 0.07      | EXT        |
| 2     | 0.06      | EXT        |
| 3     | 0.04      | EXT        |
| 4     | 0.04      | COMP       |
| 5     | 0.04      | EXT        |
| 6     | 0.04      | COMP       |
| 7     | 0.03      | EXT        |
| 8     | 0.03      | COMP       |
| 9     | 0.03      | COMP       |
| 10    | 0.02      | EXT        |

**Table 12: Clustering analysis of drug-39S in pure water (distance cutoff: 2.0 Å). The Table lists the 10 most populated clusters accounting together for 59% of the equilibrium ensemble. For each cluster the relative population and a short description of the typical structural motif are reported (COMP: compact structure; MED: medium compactness structure; EXT: extended conformation). The population of each cluster is normalized with respect to the total equilibrium ensemble (16016 structures).**

| Clust | Rel. Pop. | Short Desc |
|-------|-----------|------------|
| 1     | 0.12      | MED        |
| 2     | 0.09      | MED        |
| 3     | 0.09      | MED        |
| 4     | 0.08      | MED        |
| 5     | 0.05      | COMP       |
| 6     | 0.04      | EXT        |
| 7     | 0.03      | EXT        |
| 8     | 0.03      | EXT        |
| 9     | 0.03      | COMP       |
| 10    | 0.02      | EXT        |

**Table 13: Clustering analysis of drug-39R in pure water (distance cutoff: 2.0 Å). The Table lists the 10 most populated clusters accounting together for 40% of the equilibrium ensemble. For each cluster the relative population and a short description of the typical structural motif are reported (COMP: compact structure; EXT: extended conformation). The population of each cluster is normalized with respect to the total equilibrium ensemble (16016 structures).**

| Clust | Rel. Pop. | Short Desc |
|-------|-----------|------------|
| 1     | 0.07      | EXT        |
| 2     | 0.06      | EXT        |
| 3     | 0.04      | EXT        |
| 4     | 0.04      | COMP       |
| 5     | 0.04      | EXT        |
| 6     | 0.04      | COMP       |
| 7     | 0.03      | EXT        |
| 8     | 0.03      | COMP       |
| 9     | 0.03      | COMP       |
| 10    | 0.02      | EXT        |

**Table 14: Clustering analysis of drug-38 in pure water (distance cutoff: 2.0 Å). The Table lists the 10 most populated clusters accounting together for 53% of the equilibrium ensemble. For each cluster the relative population and a short description of the typical structural motif are reported (COMP: compact structure; EXT: extended conformation). The population of each cluster is normalized with respect to the total equilibrium ensemble (16016 structures).**

| Clust | Rel. Pop. | Short Desc |
|-------|-----------|------------|
| 1     | 0.12      | COMP       |
| 2     | 0.09      | COMP       |
| 3     | 0.07      | COMP       |
| 4     | 0.06      | COMP       |
| 5     | 0.05      | COMP       |
| 6     | 0.05      | COMP       |
| 7     | 0.03      | COMP       |
| 8     | 0.02      | COMP       |
| 9     | 0.02      | COMP       |
| 10    | 0.02      | COMP       |

**Table 15: Clustering analysis of drug-43 in pure water (distance cutoff: 2.0 Å). The Table lists the 10 most populated clusters accounting together for 72% of the equilibrium ensemble. For each cluster the relative population and a short description of the typical structural motif are reported (COMP: compact structure; EXT: extended conformation). The population of each cluster is normalized with respect to the total equilibrium ensemble (16016 structures).**

| Clust | Rel. Pop. | Short Desc |
|-------|-----------|------------|
| 1     | 0.25      | COMP       |
| 2     | 0.13      | COMP       |
| 3     | 0.10      | EXT        |
| 4     | 0.05      | COMP       |
| 5     | 0.05      | COMP       |
| 6     | 0.04      | COMP       |
| 7     | 0.03      | COMP       |
| 8     | 0.03      | EXT        |
| 9     | 0.02      | EXT        |
| 10    | 0.02      | EXT        |

**Table 16: Clustering analysis of drug-44 in pure water (distance cutoff: 2.0 Å). The Table lists the 10 most populated clusters accounting together for 62% of the equilibrium ensemble. For each cluster the relative population and a short description of the typical structural motif are reported (COMP: compact structure; EXT: extended conformation). The population of each cluster is normalized with respect to the total equilibrium ensemble (16016 structures).**

| Clust | Rel. Pop. | Short Desc |
|-------|-----------|------------|
| 1     | 0.19      | COMP       |
| 2     | 0.10      | EXT        |
| 3     | 0.09      | COMP       |
| 4     | 0.07      | COMP       |
| 5     | 0.06      | COMP       |
| 6     | 0.03      | COMP       |
| 7     | 0.02      | EXT        |
| 8     | 0.02      | COMP       |
| 9     | 0.02      | COMP       |
| 10    | 0.02      | COMP       |

**Table 17: Clustering analysis of drug-1 in DMSO (distance cutoff: 3.0 Å). The Table lists the 10 most populated clusters accounting together for 97.5% of the equilibrium ensemble. For each cluster the relative population and a short description of the typical structural motif are reported (COMP: compact structure; EXT: extended conformation). The population of each cluster is normalized with respect to the total equilibrium ensemble (16016 structures).**

| Clust | Rel. Pop. | Short Desc |
|-------|-----------|------------|
| 1     | 0.61      | COMP       |
| 2     | 0.18      | COMP       |
| 3     | 0.08      | COMP       |
| 4     | 0.03      | COMP       |
| 5     | 0.02      | COMP       |
| 6     | 0.02      | COMP       |
| 7     | 0.01      | EXT        |
| 8     | 0.01      | EXT        |
| 9     | 0.01      | EXT        |
| 10    | 0.005     | EXT        |

**Table 18: Clustering analysis of drug-38 in DMSO (distance cutoff: 3.0 Å). The Table lists the 10 most populated clusters accounting together for 81% of the equilibrium ensemble. For each cluster the relative population and a short description of the typical structural motif are reported (COMP: compact structure; MED: medium compactness structure; EXT: extended conformation). The population of each cluster is normalized with respect to the total equilibrium ensemble (16016 structures).**

| Clust | Rel. Pop. | Short Desc |
|-------|-----------|------------|
| 1     | 0.26      | COMP       |
| 2     | 0.19      | MED        |
| 3     | 0.13      | COMP       |
| 4     | 0.06      | MED        |
| 5     | 0.04      | COMP       |
| 6     | 0.03      | COMP       |
| 7     | 0.03      | EXT        |
| 8     | 0.03      | COMP       |
| 9     | 0.02      | COMP       |
| 10    | 0.02      | EXT        |

**Table 19: Clustering analysis of drug-43 in DMSO (distance cutoff: 3.0 Å). The Table lists the 10 most populated clusters accounting together for 97.9% of the equilibrium ensemble. For each cluster the relative population and a short description of the typical structural motif are reported (COMP: compact structure; EXT: extended conformation). The population of each cluster is normalized with respect to the total equilibrium ensemble (16016 structures).**

| Clust | Rel. Pop. | Short Desc |
|-------|-----------|------------|
| 1     | 0.61      | COMP       |
| 2     | 0.22      | COMP       |
| 3     | 0.06      | COMP       |
| 4     | 0.04      | EXT        |
| 5     | 0.02      | COMP       |
| 6     | 0.01      | EXT        |
| 7     | 0.01      | COMP       |
| 8     | 0.005     | COMP       |
| 9     | 0.002     | EXT        |
| 10    | 0.002     | COMP       |

**Table 20: Clustering analysis of drug-44 in DMSO (distance cutoff: 3.0 Å). The Table lists the 10 most populated clusters accounting together for 98.2% of the equilibrium ensemble. For each cluster the relative population and a short description of the typical structural motif are reported (COMP: compact structure; EXT: extended conformation). The population of each cluster is normalized with respect to the total equilibrium ensemble (16016 structures).**

| Clust | Rel. Pop. | Short Desc |
|-------|-----------|------------|
| 1     | 0.64      | COMP       |
| 2     | 0.23      | COMP       |
| 3     | 0.04      | EXT        |
| 4     | 0.03      | COMP       |
| 5     | 0.01      | EXT        |
| 6     | 0.01      | EXT        |
| 7     | 0.01      | COMP       |
| 8     | 0.005     | COMP       |
| 9     | 0.005     | EXT        |
| 10    | 0.002     | EXT        |

**Table 21: Clustering analysis of drug IK682 in water (distance cutoff: 3.0 Å). The Table lists the 10 most populated clusters accounting together for 85% of the equilibrium ensemble. For each cluster the relative population and a short description of the typical structural motif are reported (COMP: compact structure; EXT: extended conformation). The population of each cluster is normalized with respect to the total equilibrium ensemble (16016 structures).**

| Clust | Rel. Pop. | Short Desc |
|-------|-----------|------------|
| 1     | 0.48      | EXT        |
| 2     | 0.13      | EXT        |
| 3     | 0.07      | EXT        |
| 4     | 0.04      | EXT        |
| 5     | 0.03      | COMP       |
| 6     | 0.03      | COMP       |
| 7     | 0.03      | EXT        |
| 8     | 0.02      | COMP       |
| 9     | 0.01      | COMP       |
| 10    | 0.01      | COMP       |

**Table 22: Clustering analysis of compound Quino1 in water (distance cutoff: 3.0 Å). The Table lists the 10 most populated clusters accounting together for 78% of the equilibrium ensemble. For each cluster the relative population and a short description of the typical structural motif are reported (COMP: compact structure; EXT: extended conformation). The population of each cluster is normalized with respect to the total equilibrium ensemble (16016 structures).**

| Clust | Rel. Pop. | Short Desc |
|-------|-----------|------------|
| 1     | 0.32      | EXT        |
| 2     | 0.13      | EXT        |
| 3     | 0.07      | EXT        |
| 4     | 0.06      | EXT        |
| 5     | 0.05      | EXT        |
| 6     | 0.04      | COMP       |
| 7     | 0.03      | EXT        |
| 8     | 0.03      | COMP       |
| 9     | 0.03      | EXT        |
| 10    | 0.02      | COMP       |

**Table 23: Clustering analysis of compound Quino2 in water (distance cutoff: 4.0 Å). The Table lists the 10 most populated clusters accounting together for 81% of the equilibrium ensemble. For each cluster the relative population and a short description of the typical structural motif are reported (COMP: compact structure; MED: medium compactness structure; EXT: extended conformation). The population of each cluster is normalized with respect to the total equilibrium ensemble (16016 structures).**

| Clust | Rel. Pop. | Short Desc |
|-------|-----------|------------|
| 1     | 0.29      | MED        |
| 2     | 0.17      | EXT        |
| 3     | 0.12      | COMP       |
| 4     | 0.06      | MED        |
| 5     | 0.06      | COMP       |
| 6     | 0.03      | EXT        |
| 7     | 0.03      | COMP       |
| 8     | 0.02      | COMP       |
| 9     | 0.02      | COMP       |
| 10    | 0.01      | COMP       |

## Chirality effects in the conformational behavior of drug-6 and drug-39 epimers in water

In Figure 7 the probability distributions of the RHS-LHS distance of drug-6R and drug-6S are reported. Both distributions are bimodal and the peak corresponding to compact conformations in both cases is centered at about 5.5-6.0 Å. The peak of extended conformations however, in drug-6S is located at about 11.0 Å and is more populated than the corresponding peak of drug-6R centered at about 8.5 Å. Correspondingly drug-6S has a higher entropy content with respect to drug-6R (see Table 1 of the main paper). In other words drug-6R appears to be more compact and less disordered in water bulk solution with respect to drug-6S, which suggests a simple experiment to test our hypothesis of a correlation between compactness and inhibition potency. If the diastereoisomeric mixture of the two epimers of drug-6 could be resolved, than we predict drug-6R to be a more powerful inhibitor than drug-6S. In order to understand how the different chirality affected

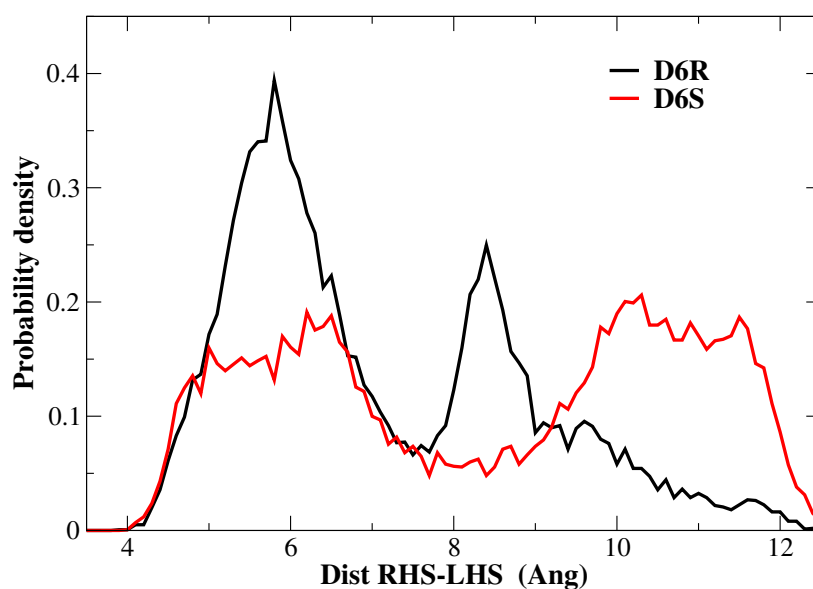

Figure 7: Probability distributions of the distance between the centers of mass of the RHS and LHS units of the two diastereoisomers of drug-6.

the probability density of the RHS-LHS distance in the two diastereoisomers, we compared the distributions of all the dihedral angles of the two species. The only relevant difference pertains



the dihedral angle of the amide bond close to the phenyl-pyrazol unit (RHS). As shown in the

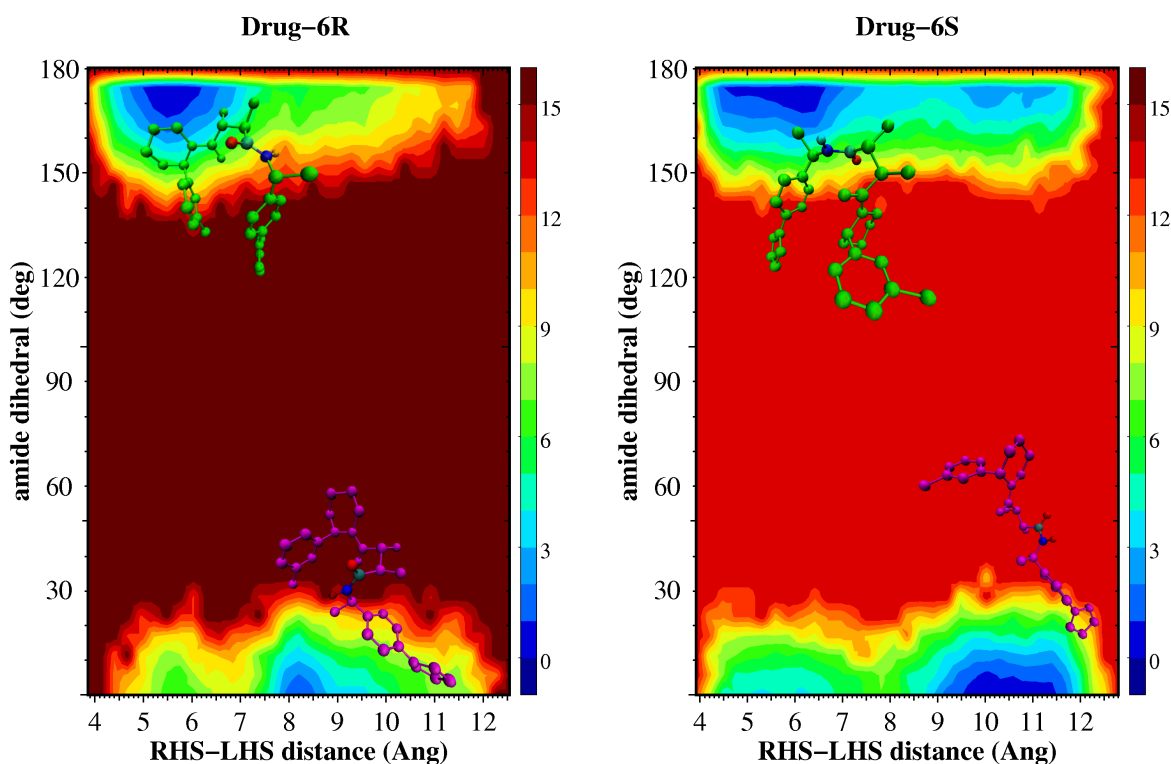

Figure 8: Free energy surface (FES) with respect to the LHS-RHS distance ( $R_{\text{LHS-RHS}}$ , in Å) and the dihedral angle ( $\omega$  in degrees) of the amide bond flanking the phenyl-pyrazol unit on the RHS in Drug-6R and Drug-6S (atoms involved in the  $\omega$  torsion are highlighted). The FES is calculated using the target replica configurations as  $G(\omega, \psi) = -RT \ln P(R_{\text{LHS-RHS}}, \omega)$ , with  $P(R_{\text{LHS-RHS}}, \omega)$  being the distribution probability of the two variables defined above. The maximum of the 2D function  $P(R_{\text{LHS-RHS}}, \omega)$  defines the zero in the 2D FES. The energy scale (labels on the color coded bar on the right of each diagram) is in  $\text{kJ mol}^{-1}$ . Perspective views of representative structures belonging to the most populated binding clusters are reported in the 2D diagrams in the corresponding  $R_{\text{LHS-RHS}}, \omega$  compact(*trans*)/extended(*cis*) region for both Drug-6R and Drug-6S epimers.

2D Free Energy surface with respect to the LHS-RHS distance and to the dihedral angle of the amide bond reported in Figure 8, in both diastereoisomers this amide bond can exist both in the *cis* (extended configuration) and *trans* conformation (compact state) explaining the bimodality of the distribution of the RHS-LHS distance. In drug-6S the *cis* extended conformation is characterized by a deeper and wider minimum with respect to what observed in drug-6R in agreement with the

greater abundance of extended conformations in the former isomer. The characterization of the equilibrium ensemble of drug-6R and drug-6S can be completed by a Quality Threshold clustering analysis with a cutoff of 2.0 Å. Figure 8 shows the representatives of typical clusters of compact and extended conformations of the two drugs. Both compact and extended conformations of the two diastereoisomers are quite similar, the only unavoidable difference being related to chirality. For instance, when superimposing the pyrazol-phenyl moiety in the compact structures of drug-6S and drug-6R we find that the chloro-phenyl group projects in opposite directions.

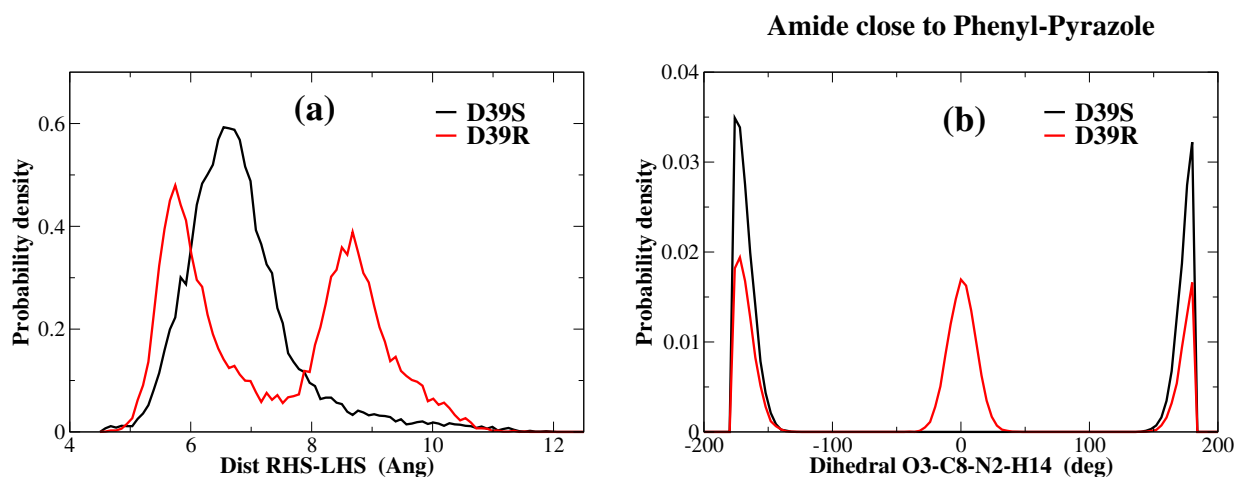

Figure 9: Equilibrium structural properties of drug-39. (a) Probability distributions of the distance between the centers of mass of the RHS and LHS units of the two diastereoisomers of drug-39. (b) Probability distribution of the dihedral angle of the amide bond close to the phenyl-pyrazol unit in the two diastereoisomers of drug-39.

Chirality has a deep effect also on the structural distribution of the isomers of drug-39. In fact, as shown in Figure 9, while the distribution of the RHS-LHS distance of drug-39R is markedly bimodal with a peak of very compact conformations centered at 5.5 Å and a peak of extended structures at 8.5 Å, the distribution of drug-39S shows a single peak of compact conformations centered at 6.5 Å and a long but flat tail vanishing at about 11.0 Å. It can thus be noted that even if some conformations of drug-39R are characterized by a shorter mean LHS-RHS distance than the compact conformations of drug-39S, the latter represent almost the totality of the equilibrium ensemble and therefore drug-39S is overall more compact than drug-39R and we predict it to be a more powerful TACE inhibitor than the cognate diastereoisomer. Similar to the case of drug-6,

the different chirality of drug-39S and drug-39R exerts its effect on the dihedral angle of the amide bond close to the phenyl-pyrazol moiety. As illustrated in Figure 9, the effect is even more marked than in drug-6. In fact, while in drug-39R this amide bond can exist both in the *cis* and in the *trans* conformation paralleling the bimodality of the distribution of the RHS-LHS distance, in drug-39S only the *trans* conformation is allowed, in agreement with the single peak in the distribution of the RHS-LHS distance of drug-39S.

## Tartrate inhibitors in DMSO

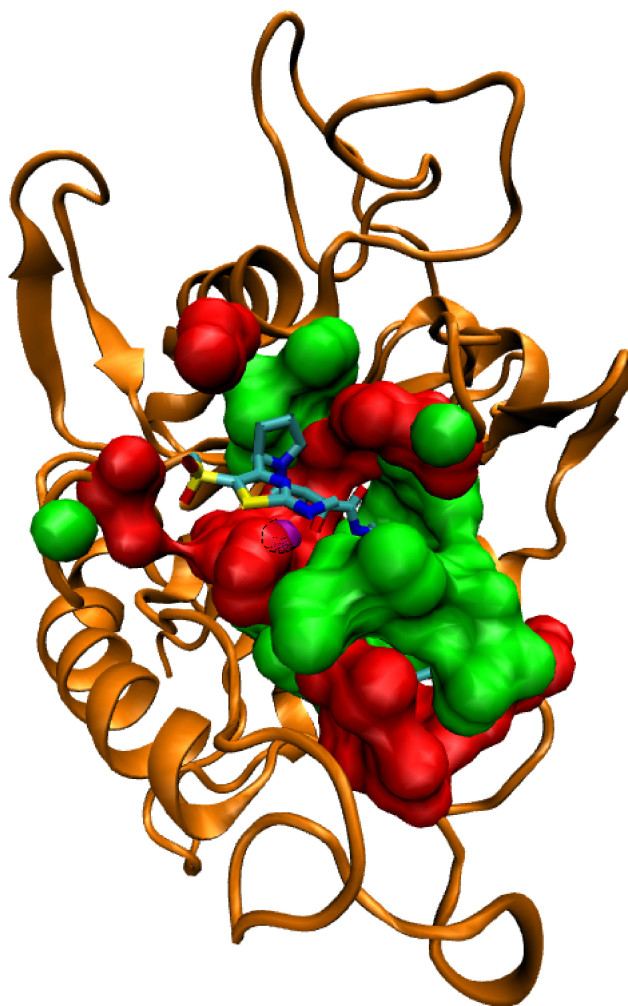

Figure 10: Hydrophobicity map of TACE active site (PDB ID: 3O64). The green and red regions represent the hydrophobic and polar residues within  $6.0 \text{ \AA}$  of drug-38 respectively. The Zinc ion is represented as a purple bead.

In order to understand the structural effect of the local amphiphilic environment surrounding the tartrate drugs (see Figure 10 and discussion in subsection “Media effects on ligand conformations and TACE binding mechanism” of the main paper) once bound to the enzyme in the hypothetical intermediate, we performed Hamiltonian REMD simulations of the most powerful in-

hibitors of the series (drug-1, drug-38, drug-43 and drug-44) in dimethyl-sulfoxide (DMSO) using the same computational protocol employed for the simulations in water. The structural ensemble of the target replica was characterized through three parameters: the radius of gyration  $R_g$ , the distance between the centers of mass of the RHS and LHS groups  $d_{RL}$ , and the RMSD of heavy atoms from the average structure. As shown in Figure 12 and Figure 13 the hydrophobic environment of DMSO tends to make the distributions of the radius of gyration and of the RHS-LHS distance broader and shifted toward higher values which is suggestive of the appearance of a more extended population. In the case of drug-1 the distribution of  $d_{RL}$  in water was characterized by a main very sharp peak of compact conformations and a hump of more extended configurations. In DMSO the hump basically disappears, the only remnant being a shoulder in the single peak of the new distribution. This pattern is even more evident in the case of drug-43 and drug-44 whose  $d_{RL}$  distributions in water are bimodal. In DMSO the peak of compact conformations decreases maintaining almost unchanged its location, while the peak of extended conformations is significantly shifted toward lower values of  $d_{RL}$  (from 9.0 Å to 7.0 Å) so that the overall appearance of the new distribution is that of a single peak split in two smaller sub-peaks. Interesting information is also provided by the distributions of the RMSD from the average structure. This parameter in fact acts as an indicator of the structural uniformity of the population. As shown in Figure 11 in the case of drug-1, drug-43 and drug-44 the distribution shifts toward lower values indicating the establishment of a more homogeneous population. This is the expected result of the disappearance of the minor peak of extended conformations that was typical of the distributions in water. The removal of this eccentric conformations makes the population more closely packed around the centroid. Interestingly, drug-38 exhibits the opposite pattern with a broadening and a shift of the distribution toward higher values. As shown in Figure 9, in water the population of drug-38 was almost exclusively composed by very compact conformations. The hydrophobic environment of DMSO loosens the hydrophobic interactions between the RHS and LHS groups that can to some extent move apart causing the reported shift of the distribution. The structural interpretation of the distributions discussed so far, can be attained through a Quality Threshold clustering of the equi-

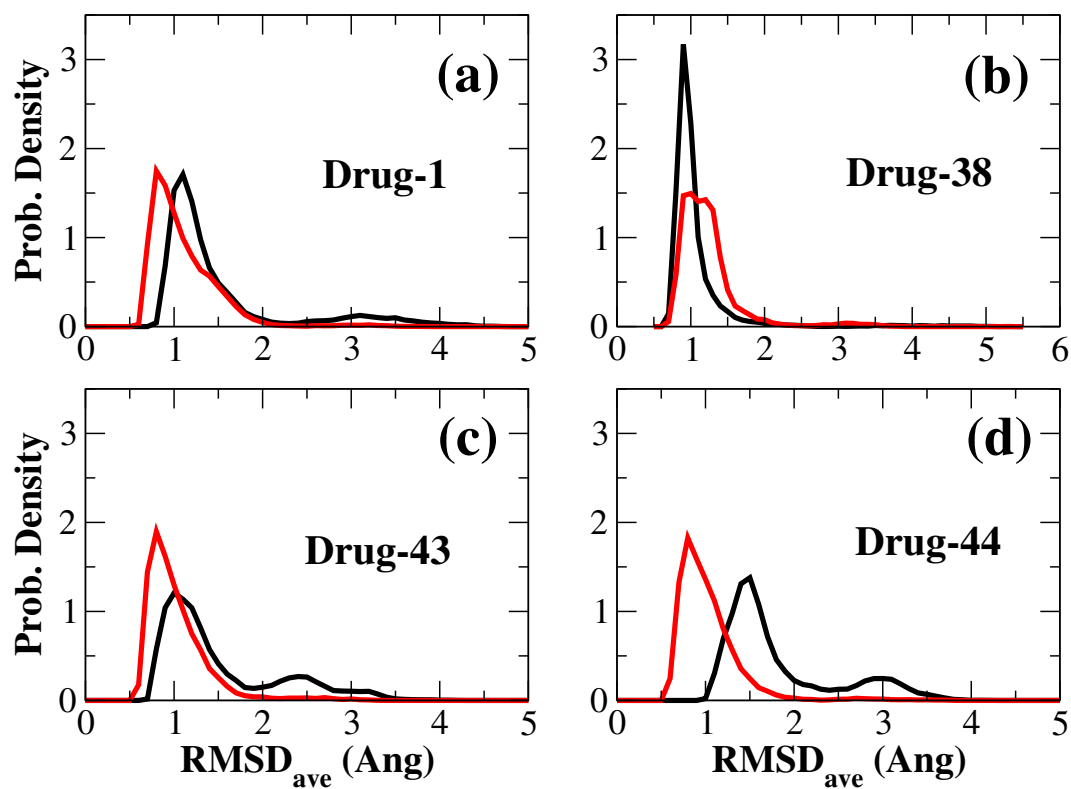

Figure 11: Distribution of the RMSD of heavy atoms from the average structure of drug-1, drug-38, drug-43 and drug-44 in water (black line) and DMSO (red line).

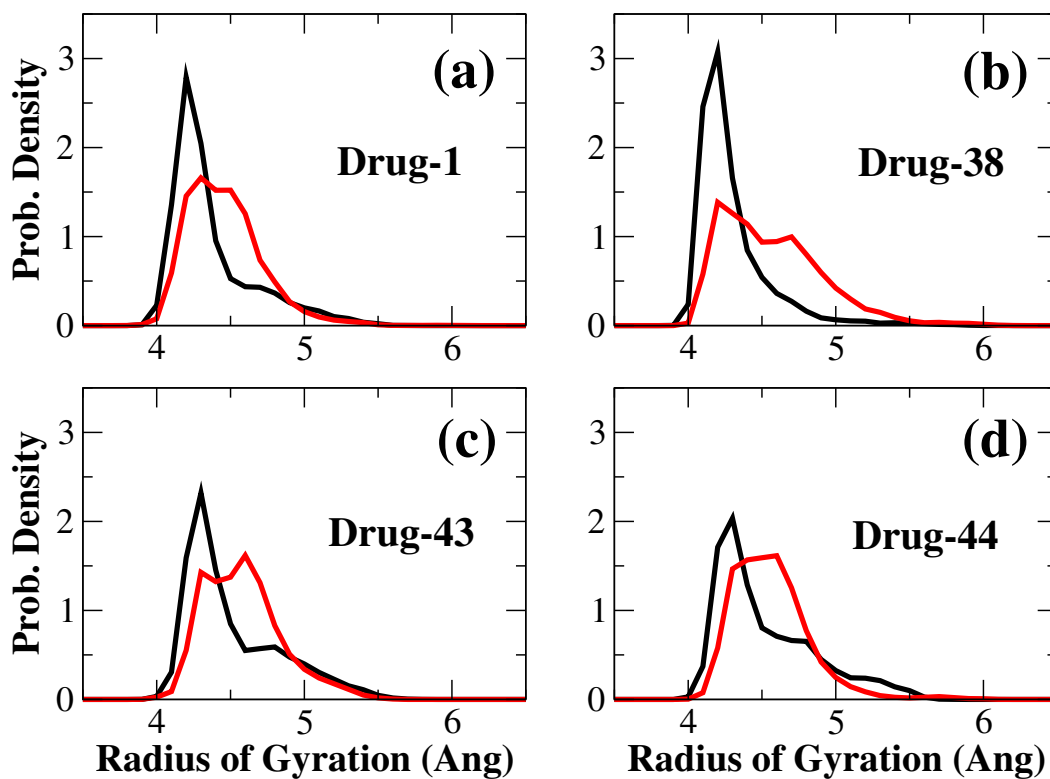

Figure 12: Distribution of the radius of gyration of drug-1, drug-38, drug-43 and drug-44 in water (black line) and DMSO (red line).

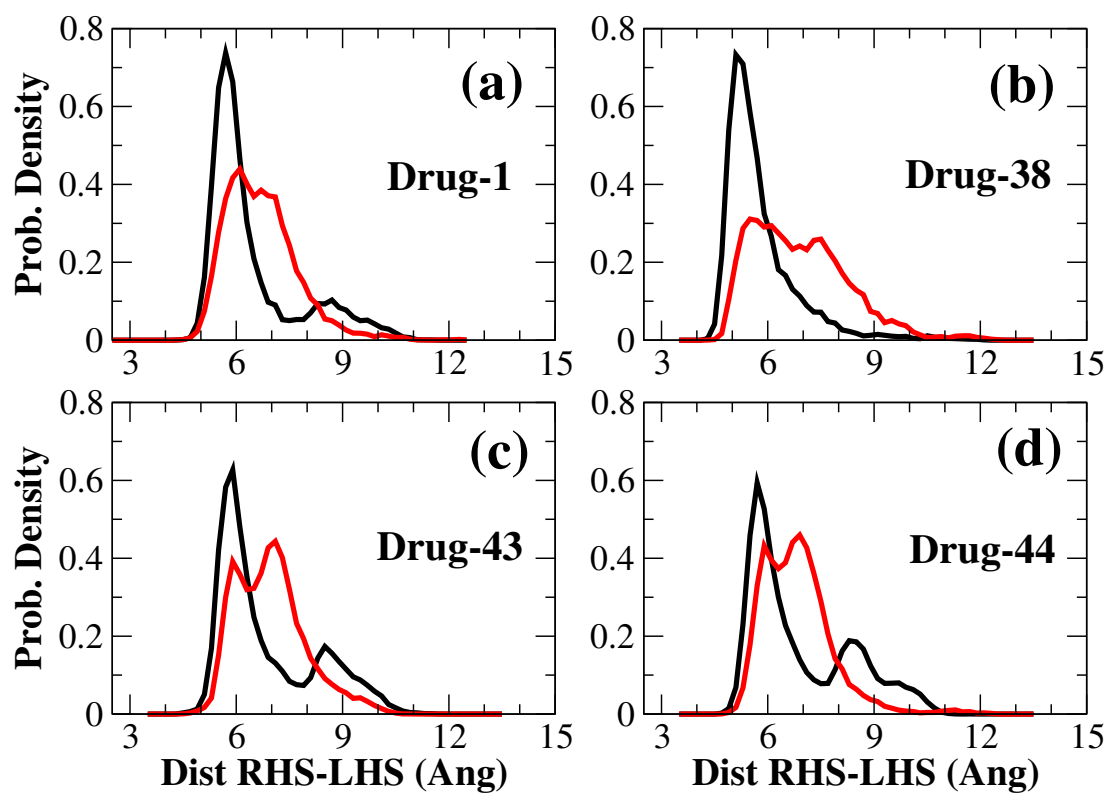

Figure 13: Distribution of the distance between the centers of mass of the RHS and LHS groups of drug-1, drug-38, drug-43 and drug-44 in water (black line) and DMSO (red line).



librium ensemble with a cutoff of 3.0 Å. In all of the four drugs simulated in DMSO it is possible to identify two main structural families of compact and extended conformations, the former family being more populated than the latter. Contrary to what occurs in the water environment, however, there is no discontinuity between the two families as reported in Figure 14 and Figure 15. For instance in drug-1 and drug-38 the 10 most populated clusters include 98% and 83% of the whole population respectively. In drug-1 four of these ten clusters corresponding to 22% of the whole

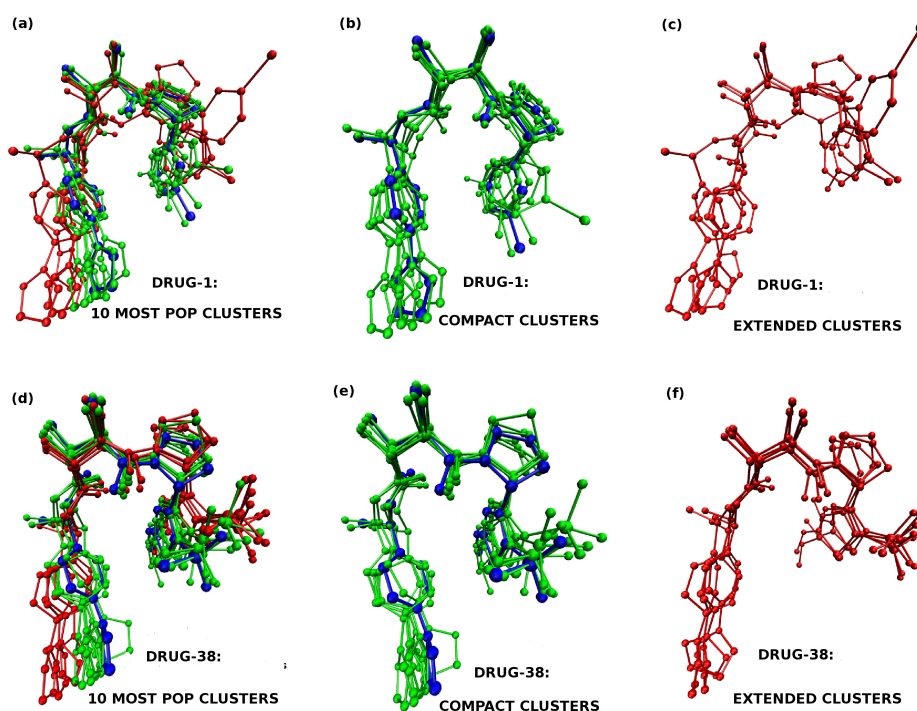

Figure 14: Structural motifs of drug-1 (first row) and drug-38 (second row) in DMSO. Panels (a) and (d) show the overlay of the representatives of the 10 most populated clusters. Compact and extended conformations are highlighted in green and red respectively and shown again independently in panels (b), (e) and panels (c), (f). The blue structure is the representative of the most populated cluster identified in water.

population comprise extended conformations while the remaining 6 clusters amounting to 76% of the population include compact structures. When the representatives of these 10 clusters are superposed using heavy atoms as shown in Figure 14, it is apparent that extended conformations are only slightly more divaricated than compact ones. There is no structural gap between the two groups and the most extended conformations of the compact family are practically undistinguishable from

the most compact structures of the extended group. The structural impact of the DMSO solvent can be better appreciated by overlaying also the representative of the most populated cluster identified in the water simulation. Figure 14 shows that the dominant water conformation is comparable to the most compact structures of the compact group equilibrated in DMSO. The situation of drug-43 and drug-44 is almost identical to that of drug-1. The 10 most populated clusters of drug-43 and drug-44 comprise 98% and 99% of the whole population respectively and the compact structures amount to 71% and 70% of the population while the extended family in both cases represents 28% of the total population. The pattern exhibited by drug-38 despite being identical to that of the other drugs from a qualitative point of view, exhibits interesting quantitative differences. In this drug the 10 most populated clusters account for 83% of the whole population the compact and extended families amounting to 51% and 31% of the full equilibrium ensemble. It thus appears that in drug-38 the destabilizing effect of DMSO is stronger than on the other drugs generating a larger group of extended conformations. This effect becomes even more pronounced if the

**Table 24: Structural composition of the equilibrium population of drug-1, drug-38, drug-43 and drug-44 in DMSO. The first column indicates the consistency of the 10 most populated clusters with respect to the whole population. The second column reports the ratio of the compact conformations found in the ten most populated clusters with respect to the total equilibrium ensemble. The third column details the percentage of the extended conformations of the ten most populated clusters with respect to the full population. In parenthesis we report the relative abundance of compact and extended conformations within the ten most populated clusters.**

| Species | 10 clust | Comp      | Ext      |
|---------|----------|-----------|----------|
| Drug-1  | 98%      | 76% (77%) | 22%(23%) |
| Drug-38 | 83%      | 51% (62%) | 31%(38%) |
| Drug-43 | 98%      | 71% (71%) | 28%(28%) |
| Drug-44 | 99%      | 70% (71%) | 28%(28%) |

ratios are computed with respect to the population of the 10 most populated clusters instead that respect to the whole population. In this case drug-38 features 62% compact conformations and 38% of extended ones while in the other drugs the percentage of extended conformations is always below 30%. The data are summarized in Table 24. The larger amount of extended conformations

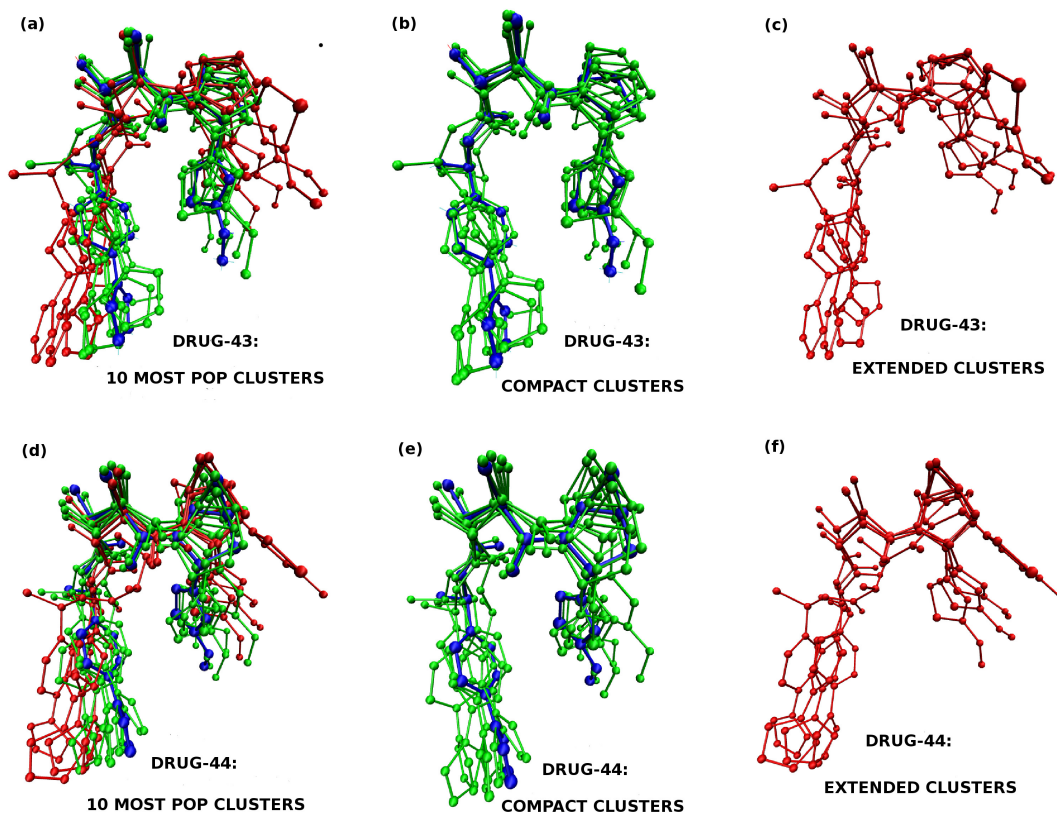

Figure 15: Structural motifs of drug-43 (first row) and drug-44 (second row) in DMSO. Panels (a) and (d) show the overlay of the representatives of the 10 most populated clusters. Compact and extended conformations are highlighted in green and red respectively and shown again independently in panels (b), (e) and panels (c), (f). The blue structure is the representative of the most populated cluster identified in water.

in the DMSO equilibrium ensemble of drug-38 highlights a twofold source of the high inhibition potency of this drug. On the one hand, the equilibrium ensemble of this molecule in bulk water is dominated by compact conformations that optimally expose the Zinc binding hydroxyl groups maximizing the probability of forming an intermediate bound complex with TACE; on the other hand the large amount of extended conformations of this molecule in DMSO suggests an efficient conformational transition to an extended configuration in the local hydrophobic environment of the active site of the enzyme. Drug-38 is thus more efficient than the other drugs in both steps of the hypothetical docking mechanism suggested by our computations.

## Crystal-like conformations in DMSO

The two-state docking mechanism that we envisage foresees a structural rearrangement of the drugs once exposed to the hydrophobic micro-environment of the TACE active site. If this hypothesis is correct, then the amount of crystal-like conformations is expected to increase when the drugs are simulated in DMSO. Figure 16 shows the distribution of the RMSD of heavy atoms of Drug-38 with respect to the crystal structure (PDB ID: 3O64). When the molecule is simulated in water, the distribution shows a single sharp peak centered at 5.0 Å suggesting only a very modest amount of crystal-like conformations. The presence of crystal-like conformations, however, may escape the RMSD analysis due to the high mobility of the methyl-sulphonil and methyl-amino groups that can freely rotate around the bonds that link them to the thiazole ring. Indeed, when the RMSD is re-computed after deletion of the two groups, the distribution slightly shifts toward lower values. Using the same approach, the RMSD was also computed after removal of the whole thiazole ring. The result is a significant down-shift of the RMSD distribution now exhibiting a single peak located at 3.0 Å and a long tail stretching down to 2.0 Å. It is interesting to compare this pattern with the results of the same analysis performed on the trajectory in DMSO. The RMSD distributions of Drug-38 with or without the methyl-sulphonil and amino-methyl groups still show a single peak at about 5.0 Å, but these peaks are lower and much broader than the corresponding peaks recorded in water and they feature a long tail extending to 6.5 Å. Thus, at first sight, the conformation of Drug-38 in DMSO is even less crystal-like than in water. This result, however, is simply the consequence of the higher entropy of the thiazole ring that in DMSO is not constrained by the hydrophobic interactions with the phenyl-pyrazole unit (stabilizing the compact conformations observed in water). As a consequence the thiazole ring can freely rotate around the bond with the pyrrolidine ring generating a large ensemble of conformations very different from the crystallographic one. When the thiazole ring is removed, however, the distribution of the RMSD moves to about 2.5 Å and is thus shifted to lower values with respect to the corresponding distribution in water. In other words, the fragment of the drug between the pyrrolidine and the pyrazole rings is very similar to the crystallographic one while the difference from the crystal can be attributed to

the rotation of the thiazole ring. This event however, does not impair the ability of the drug to fit into the S1'-S3' TACE cavity since the thiazole ring was designed to interact with the shallow and solvent-exposed non-primed pockets where some rotational freedom is allowed.

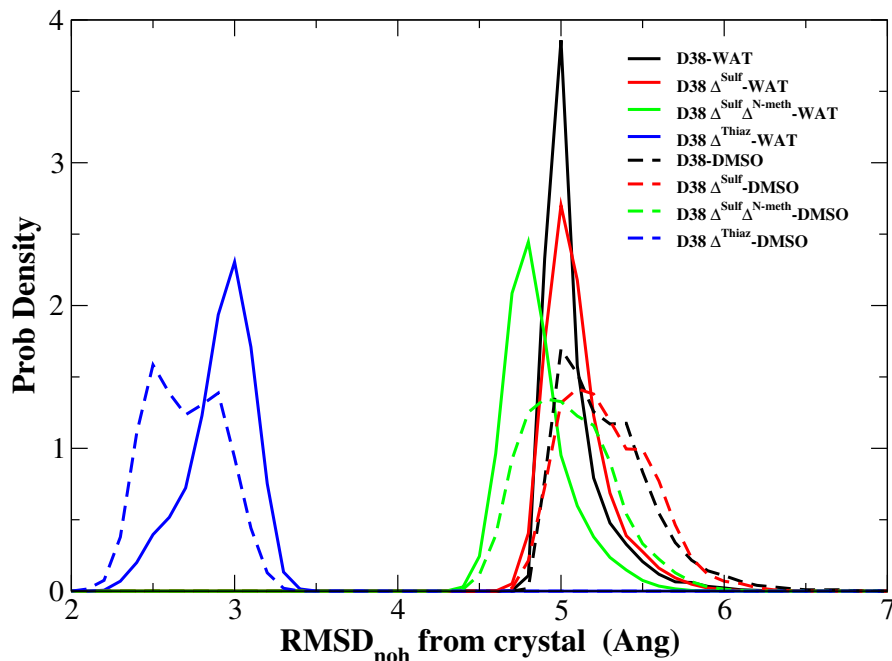

Figure 16: Probability distributions of the RMSD of heavy atoms of Drug-38 in water (solid lines) and in DMSO (dashed lines) with respect to the crystal (PDB ID: 3O64).

A significant amount of crystal-like conformations can also be detected in the equilibrium ensemble of Drug-1, Drug-43 and Drug-44. Also in this case the alignment between the three drugs and the crystal structure of Drug-38 was performed using the heavy atoms of the common scaffold *i.e.* the regio stretching from the pyrrolidine ring to the pyrazole ring. Figure 17 shows that in all of the drugs the RMSD distribution feature a single peak approximately extending from 2.0 Å to 3.5 Å. When the calculation is repeated in the trajectory recorded in DMSO the distribution shifts to lower values which is indicative of an increase in the amount of the crystal-like conformations (that we expect to be the best suited to fit into the S1'-S3' pocket of the active site). These results are perfectly consistent with the clustering analysis (cutoff distance: 3.0 Å). In Figure 18 we show the overlays of the crystal structure of Drug-38 and the representatives of typical clusters of extended conformations of Drug-38, Drug-1, Drug-43 and Drug-44. It can be noted that the tartrate

core and the phenyl-pyrazole unit (expected to interact with the Zinc ion and the S1'-S3' pocket respectively) show an excellent overlap with the crystal structure. Conversely, the superposition of the Left Hand Side unit is less satisfactory, but this detail is rather un-relevant for the stability of the enzyme-substrate complex since the LHS group was designed to be weakly engaged with the non-primed pockets.

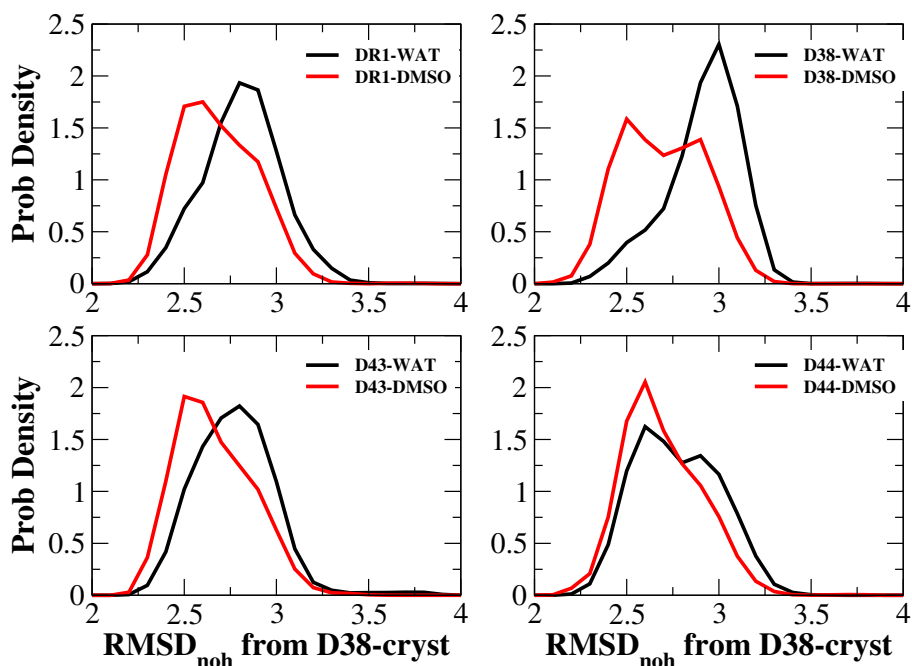

Figure 17: Probability distributions of the RMSD from the crystal structure of Drug-38 of the heavy atoms of Drug-1, Drug-38, Drug-43 and Drug-44 in water (black lines) and in DMSO (red lines).

Figure 16 and Figure 17 clearly show that when the tartrate-derived TACE inhibitors are displaced from an hydrophilic to an hydrophobic environment there is a significant increase in the amount of crystal-like, extended conformations. Within the framework of the postulated two-state mechanism the extent of this increase should correlate with the potency of the inhibitor. This issue is addressed in Figure 19 where crystal-like and non crystal-like conformations are discriminated using a cutoff value of 3.0 Å for the RMSD of heavy atoms with respect to the crystal structure of Drug-38. In Figure 19 we can then plot the logarithm of the inhibition constant as a function of the increase in the fraction of crystal-like conformations resulting from the *WAT* → *DMSO* solvent

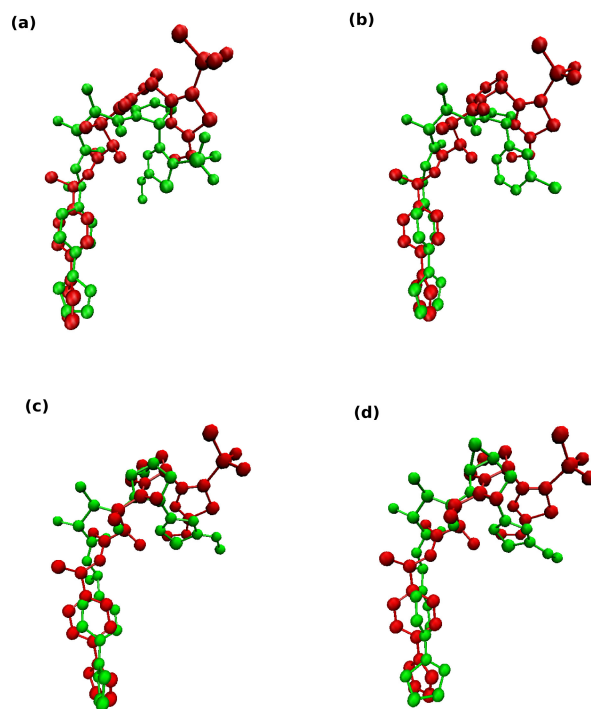

Figure 18: Overlays of the crystal structure of Drug-38 (PDB ID: 3O64; red) and the representatives of typical clusters of extended structures (green) of Drug-1 (a), Drug-38 (b), Drug-43 (c) and Drug-44 (d). The superposition has been realized so as to minimize the RMSD of the heavy atoms of the common fragment extending from the pyrrolidine ring to the pyrazole ring.

change. The correlation coefficient computed using all four points  $r = -0.33$  is low because the point corresponding to Drug-44 acts as an outlier. If this point is excluded, however, the correlation coefficient increases to  $r = -0.99$ .

We are aware that a correlation coefficient  $r = -0.99$  only using three points is not a strong evidence. While work is underway in our lab to simulate other tartrate-derived inhibitors in DMSO, we further support our conclusions studying the correlation between the logarithm of the inhibition constant and the increase in the fraction of extended conformations resulting from the *WAT* → *DMSO* solvent change. Based on the plots in Fig 2 of the main paper and Figure 13 extended and non extended conformations are discriminated based on a cutoff of 6.0 Å in the distance between the centers of mass of the RHS and LHS units. The regression line is reported in Figure 20. As in Figure 19 if the outlier (point D44) is excluded, the linear correlation is excellent ( $r = -0.998$ ).

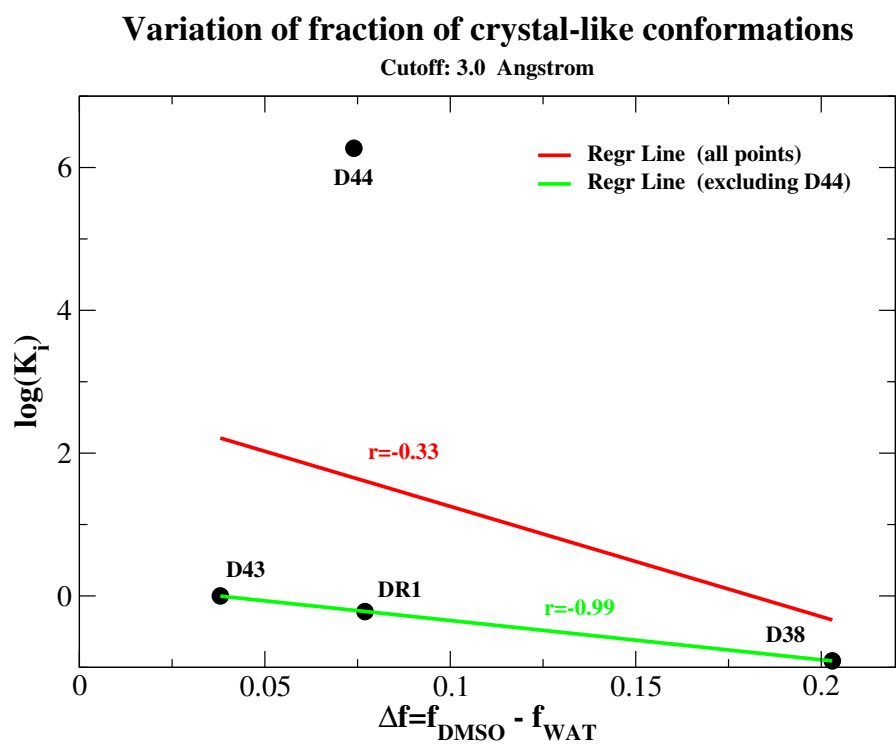

Figure 19: Regression line between the increase in the fraction of crystal-like conformations in the  $WAT \rightarrow DMSO$  solvent change and the logarithm of the inhibition constant. The red line is the regression line computed using the points corresponding to Drug-1, Drug-38, Drug-43 and Drug-44. The green line is the regression line computed excluding Drug-44 that acts as an outlier.



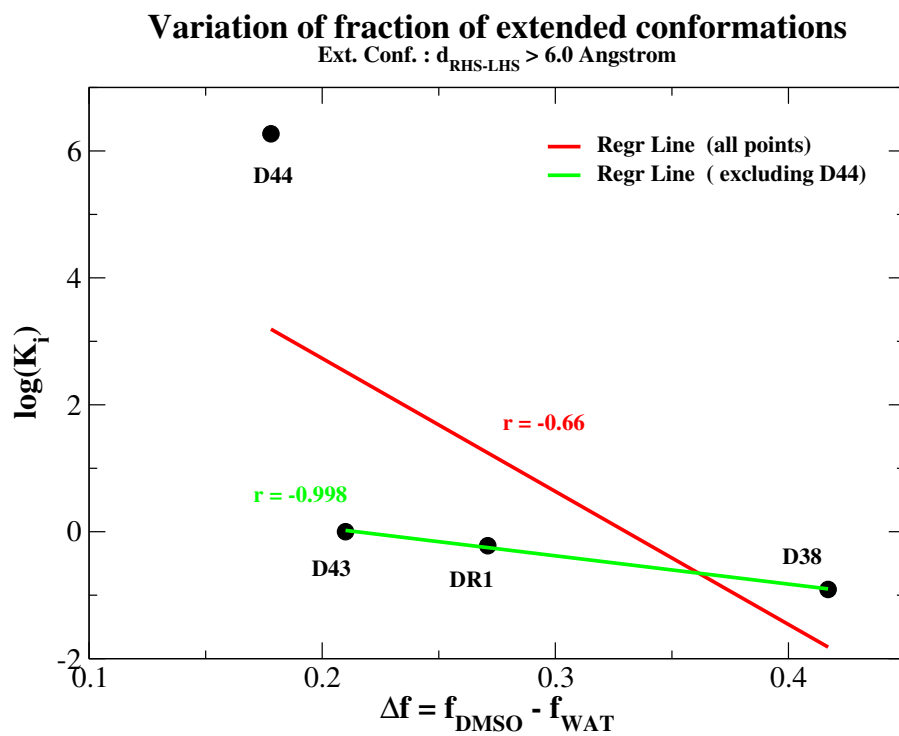

Figure 20: Regression line between the increase in the fraction of extended conformations in the  $\text{WAT} \rightarrow \text{DMSO}$  solvent change and the logarithm of the inhibition constant. The red line is the regression line computed using the points corresponding to Drug-1, Drug-38, Drug-43 and Drug-44. The green line is the regression line computed excluding Drug-44 that acts as an outlier.

## Docking mechanism of tartrate-based TACE inhibitor

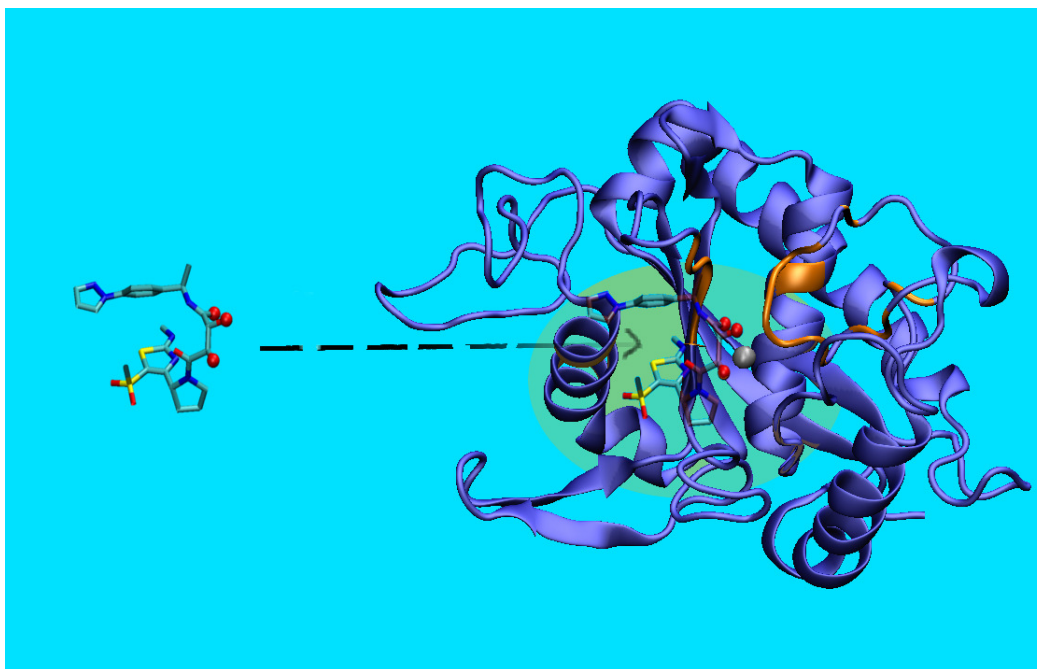

Figure 21: Step 1: the drug in its compact/low entropy conformation in water environment (cyan color) binds the catalytic zinc (gray bead) with the solvent exposed ZBG (hydroxy groups and LHS carbonyl unit)

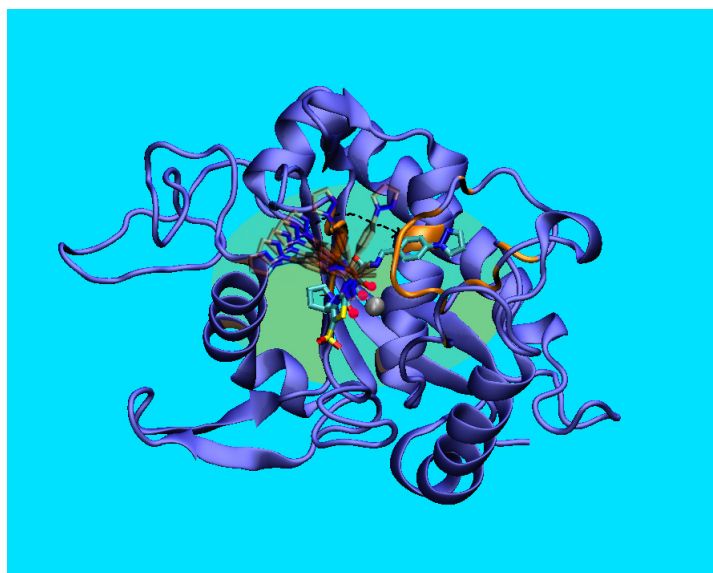

Figure 22: Step 2: when docked to the TACE, the less polar environment (green) promotes the drug reorganization and the access of the phenyl-pyrazol moiety to the primed pocket (residues in orange)
